# Supplementary material
Source: Royal Society of Chemistry journal article supplement (doi:10.1039/d6qi00310a)
Supplement: d6qi00310a1.pdf [file d6qi00310a1.pdf]

Supplementary Materials

Interfacial Electron Spillover Modulated  $\text{Cu}^{+}$ –  
 $\text{Ti}^{4-\delta}$  Active Sites Facilitating Nitrate  
Hydrogenation for Photoelectrochemical  
Ammonia Synthesis

*Jingfu Sun<sup>#</sup>, Zhen Liu<sup>#</sup>, Xi Han, Huibin Li, Huige Zhang, Zhiheng Wang, Jinlong  
Zhang, Yipeng Guo, Jianbo Li and Yaoguang Yu\**

School of Materials,

Shenzhen Campus of Sun Yat-sen University,

No. 66, Gongchang Road, Shenzhen, Guangdong 518107, P. R. China

Email: yuyg5@mail.sysu.edu.cn

## Chemicals and reagents

Tetrabutyl titanate ( $\text{Ti}(\text{OC}_4\text{H}_9)_4$ ), hydrochloric acid (HCl), sodium fluoride (NaF), sodium hydroxide (NaOH), copper sulfate ( $\text{CuSO}_4$ ), ethanol ( $\text{C}_2\text{H}_5\text{OH}$ ), potassium nitrate ( $\text{KNO}_3$ ), potassium hydroxide (KOH), sodium salicylate ( $\text{C}_7\text{H}_5\text{NaO}_3$ ), sodium nitroferricyanide ( $\text{Na}_2[\text{Fe}(\text{CN})_5\text{NO}]$ ), sodium hypochlorite (NaClO), sodium citrate ( $\text{Na}_3\text{C}_6\text{H}_5\text{O}_7$ ) p-aminobenzenesulfonamide ( $\text{C}_6\text{H}_8\text{N}_2\text{O}_2\text{S}$ ), phosphoric acid ( $\text{H}_3\text{PO}_4$ ), N-(1-Naphthyl) ethylenediamine dihydrochloride ( $\text{C}_{12}\text{H}_{14}\text{N}_2 \cdot 2\text{HCl}$ ) and potassium nitrite ( $\text{KNO}_2$ ) were purchased from Macklin Biochemical Co. Ltd. All reagents and solvents were analytical grade. Deionized (DI) water was used during the experiments.

## Materials preparation

*Preparation of  $\text{TiO}_2$ .* The typical synthesis process is as follows: 1 mL of tetrabutyl titanate was dissolved in a mixture of 12.5 mL hydrochloric acid (HCl) and 17.5 mL deionized water. After stirring for 10 minutes, 0.25 g of sodium fluoride (NaF) was added. The resulting solution was then transferred into a 50 mL polytetrafluoroethylene (PTFE) liner containing a fluorine-doped tin oxide (FTO) substrate ( $2 \times 2.5 \text{ cm}^2$ ) with its conductive side facing downward. The liner was placed in a hydrothermal autoclave and maintained at  $150 \text{ }^\circ\text{C}$  for 6 hours. After hydrothermal treatment, the FTO substrate was taken out, cleaned sequentially with deionized water and anhydrous ethanol, and dried at  $80 \text{ }^\circ\text{C}$ . Subsequently, calcination was performed in a muffle furnace at  $450 \text{ }^\circ\text{C}$  for 2 hours with a heating rate of  $5 \text{ }^\circ\text{C}/\text{min}$  to obtain the titanium dioxide ( $\text{TiO}_2$ ) substrate.

*Preparation of  $\text{Cu}/\text{TiO}_2$  Photoelectrodes.* 0.1197 g of copper sulfate ( $\text{CuSO}_4$ ) was dispersed in 50 mL deionized water to form an electrolyte. A  $\text{TiO}_2$  substrate with a size

of  $1.25 \times 2 \text{ cm}^2$  was clamped as the working electrode for electrodeposition at a constant potential of  $-0.5 \text{ V}$  vs Ag/AgCl. By controlling different electrodeposition durations, Cu/TiO<sub>2</sub>-L, Cu/TiO<sub>2</sub>-M and Cu/TiO<sub>2</sub>-H catalyst series were prepared. The as-prepared samples were washed with ethanol and distilled water, followed by drying at  $60 \text{ }^\circ\text{C}$  to obtain the target catalysts.

### **Photoelectrochemical Nitrate Reduction Reaction**

PEC NO<sub>3</sub>RR performance tests were conducted using a three-electrode system on a CHI 660E electrochemical workstation in an H-type electrolytic cell. The working electrodes were TiO<sub>2</sub>, Cu/TiO<sub>2</sub>-L, Cu/TiO<sub>2</sub>-M and Cu/TiO<sub>2</sub>-H, respectively. A platinum (Pt) electrode was used as the counter electrode, and a silver/silver chloride (Ag/AgCl) electrode served as the reference electrode. The electrolyte in the cathode chamber consisted of  $0.1 \text{ mol/L}$  potassium nitrate (KNO<sub>3</sub>) and  $0.1 \text{ mol/L}$  potassium hydroxide (KOH). All electrolytes were purged with argon (Ar) for 30 minutes prior to PEC tests to remove dissolved oxygen. A 300 W xenon lamp was used as the light source to irradiate the photocathode. If not specified, all linear voltammetry scanning curves (LSV) are corrected for  $iR_s$  compensation, where  $R_s$  is the solution resistance ( $\Omega$ ) between the working electrode and the reference electrode.

### **Characterization**

Powder X-ray diffraction (XRD) patterns were performed with a Bruker D8 advanced diffractometer with Cu K $\alpha$  X-ray source ( $\lambda = 1.5406 \text{ \AA}$ ). The transmission electron microscopy (TEM) and high-resolution TEM (HRTEM) images were taken on a JEM-F200 transmission electron microscope operated at  $200 \text{ kV}$ . Scanning transmission microscopy (SEM) measurements were conducted on Helios 5 CX. X-ray

photoelectron spectroscopy (XPS) tests were performed on Kratos Supra+ with Al-K $\alpha$  radiation system. The calibration of XPS spectra was performed by using the C 1s peak at 284.8 eV. X-ray absorption spectroscopy (XAS) tests were conducted in a fluorescence mode at beamline X-ray absorption fine structure (XAFS) of Shanghai Synchrotron Radiation Facility (SSRF). In-situ attenuated total reflectance-Fourier transform infrared (ATR-FTIR) spectra were acquired on a Bruker VERTEX 70 based on the absorption mode equipped. The photoelectrochemical performances were measured with a CHI660E electrochemical workstation (Shanghai Chenhua Instruments).

### **Product detection of NO<sub>3</sub>RR**

*Determination of ammonia.* The concentration of NH<sub>3</sub> was spectrophotometrically determined by using the indophenol blue method. Typically, 2 mL of pre-diluted electrolyte were taken out and mixed with 2 mL of 1 M NaOH solution containing 5 wt.% of salicylic acid and 5 wt.% of sodium citrate. Then, the above solution was mixed with 1 mL of 0.05 M NaClO solution and 0.2 mL of an aqueous solution of 1 wt.% sodium nitroprusside. After the above mixture was kept in the dark for 2 h, the absorption spectrum was acquired using an UV-vis spectrophotometer (Hitachi UH530) at the wavelength of 654 nm. The calibration curve of ammonia concentration and absorbance was prepared by using a series of standard NH<sub>4</sub>Cl solutions.

*Determination of nitrite.* Firstly, 4 g of p-aminobenzenesulfonamide, 0.2 g of N-(1-Naphthyl) ethylenediamine dihydrochloride, and 10 mL of phosphoric acid ( $\rho = 1.70$  g/mL) were added into 50 mL of ultrapure water. After ultrasonication for about 2 mins,

the obtained transparent solution was used as the color reagent. Then, 5 mL of dilution electrolyte were mixed with 0.1 mL of color reagent. After 20 mins, the absorption spectrum was taken by using an UV-vis spectrophotometer (Hitachi UH530) at the wavelength of 540 nm. A series of standard potassium nitrite solutions were prepared to obtain the calibration curve.

### **Calculation of the Faradaic efficiency (FE) and yield rate (R)**

In this work, the FE of  $\text{NH}_3$  or  $\text{NO}_2^-$  was calculated as follows:

$$\text{FE}_{\text{NH}_3} = (8 \times F \times C_{\text{NH}_3} \times V) / (M_{\text{NH}_3} \times Q) \times 100\%$$

$$\text{FE}_{\text{NO}_2^-} = (2 \times F \times C_{\text{NO}_2^-} \times V) / (M_{\text{NO}_2^-} \times Q) \times 100\%$$

The yield rate of  $\text{NH}_3$  was calculated according to the following equation:

$$R_{\text{NH}_3} = (C_{\text{NH}_3} \times V) / (m_{\text{cat}} \times t)$$

where  $F$  is the Faraday constant ( $96485 \text{ C mol}^{-1}$ ),  $C_{\text{NO}_2^-}$  and  $C_{\text{NH}_3}$  represent the concentration of  $\text{NO}_2^-$  and  $\text{NH}_3$  (mg/L),  $V$  is the volume of the electrolyte (L),  $M_{\text{NO}_2^-}$  and  $M_{\text{NH}_3}$  denote the molar mass of  $\text{NO}_2^-$  and  $\text{NH}_3$  (mg/mol),  $Q$  is the total amount of charge (C),  $m_{\text{cat}}$  is the total amount of catalyst (mg), and  $t$  is the potentiostatic test time (h).

### **Photoelectrochemical in situ FTIR tests**

The in-situ attenuated-total-reflectance FTIR spectroscopy with a range of 400–4000  $\text{cm}^{-1}$  was acquired by using a Bruker VERTEX 70 spectrometer. In the measurement cell, the  $\text{Cu/TiO}_2$  photoelectrode was the working electrode, and a platinum wire and an  $\text{Ag/AgCl}$  electrode were used as the counter and reference electrodes, respectively. The electrolyte in the cathode chamber consisted of 0.1 mol/L

potassium nitrate ( $\text{KNO}_3$ ) and 0.1 mol/L potassium hydroxide (KOH). The background spectrum was taken under dark and open-circuit conditions. The in-situ FTIR spectra were collected for the photoelectrode during PEC  $\text{NO}_3\text{RR}$  under light irradiation (Xenon arc lamp) with applied bias ranging from  $-0.20$  V to  $-0.80$  V vs RHE.

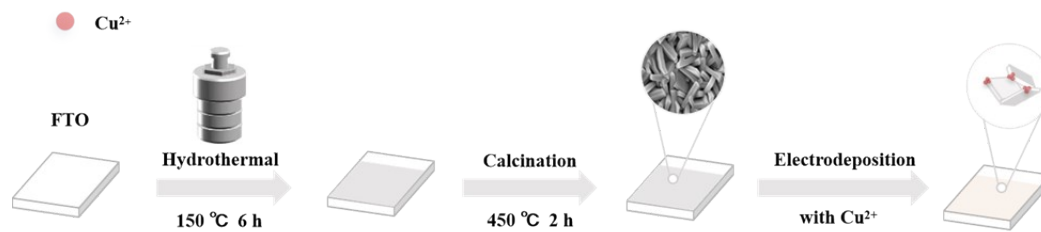

**Figure S1.** Synthetic route of Cu/TiO<sub>2</sub> photoelectrodes.

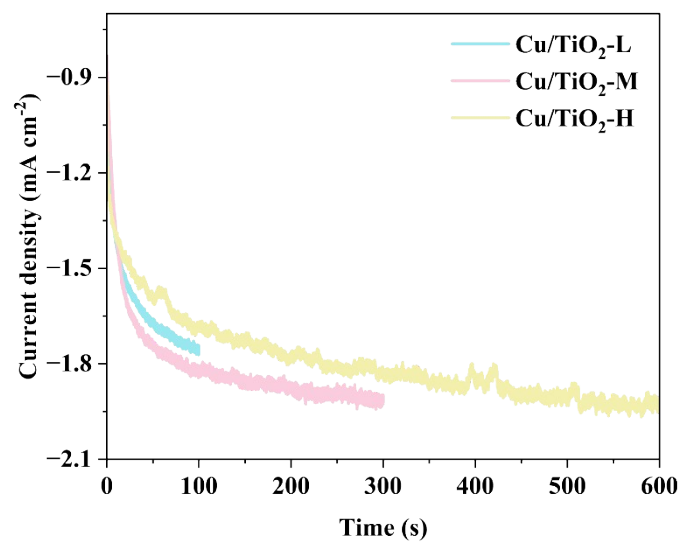

**Figure S2.** The  $i-t$  curve of the Cu/TiO<sub>2</sub> photoelectrodes.

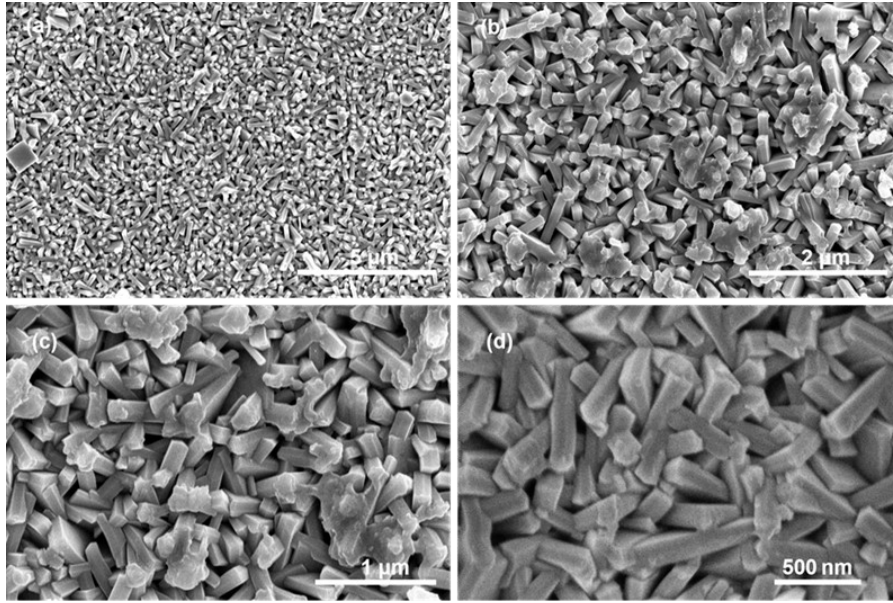

**Figure S3.** SEM image of Cu/TiO<sub>2</sub>-M photoelectrode.

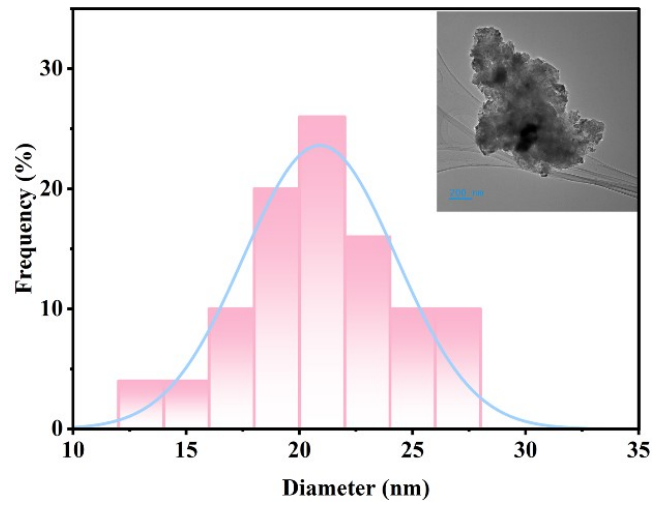

**Figure S4.** Particle size distribution of Cu/TiO<sub>2</sub>-M photoelectrode.

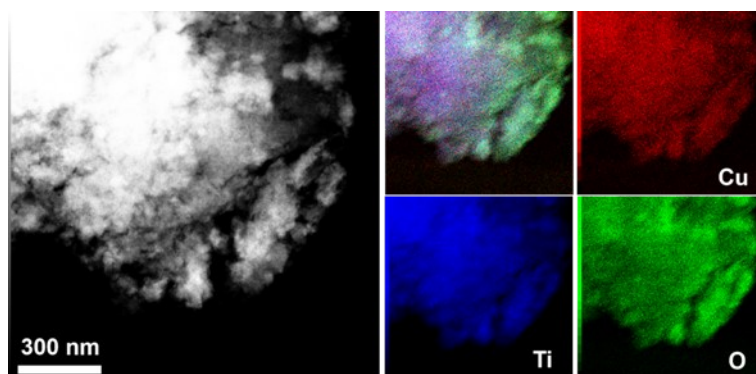

**Figure S5.** TEM image and the corresponding EDS elemental mappings of Cu/TiO<sub>2</sub>-M photoelectrode.

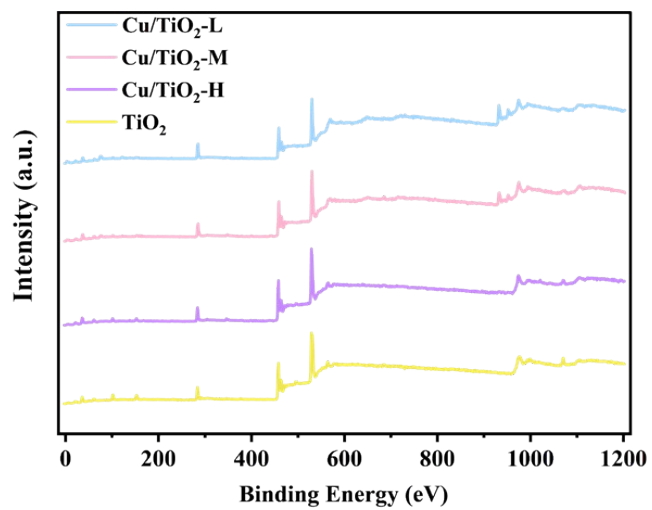

**Figure S6.** XPS survey spectrum of Cu/TiO<sub>2</sub> photoelectrodes.

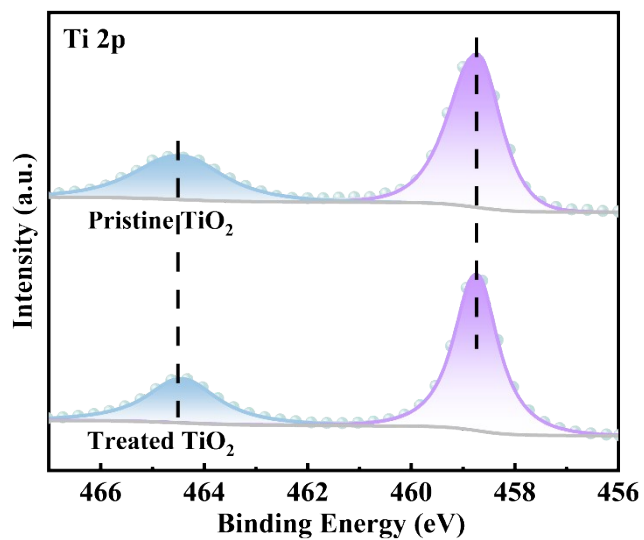

**Figure S7.** Ti 2p XPS spectra of TiO<sub>2</sub> with and without electrodeposition process.

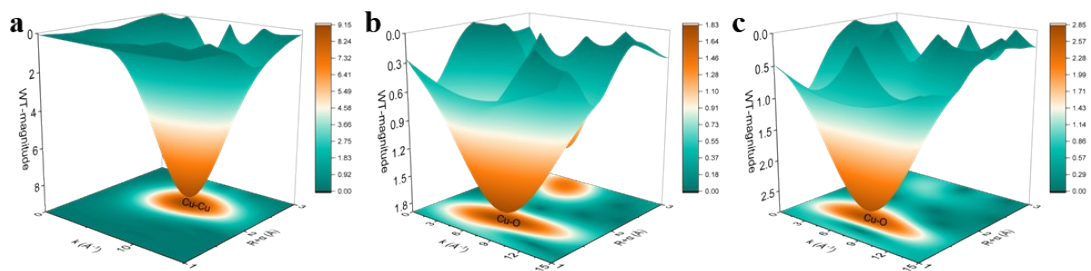

**Figure S8.** WT for  $k^3$ -weighted Cu K-edge EXAFS signals of (a) Cu foil and (b)  $\text{Cu}_2\text{O}$  and (c) Cu/ $\text{TiO}_2$ -M photoelectrode.

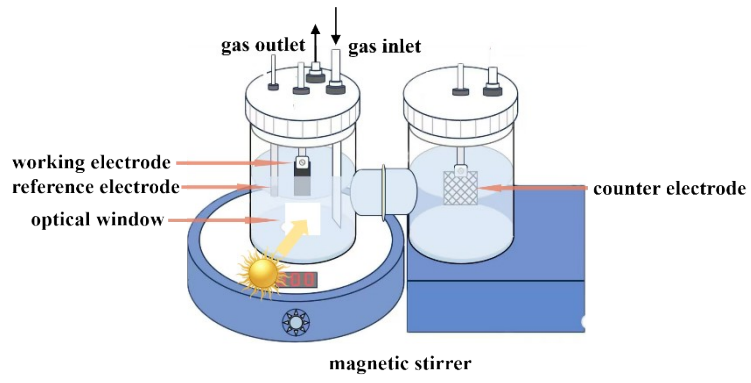

**Figure S9.** Schematic illustration of a standard three-electrode photoelectrochemical cell.

**Figure S10.** The UV-vis standard curve of  $\text{NH}_3$  with different concentrations of  $\text{NH}_4\text{Cl}$  solutions as standards. (a) UV-vis curves of assays with  $\text{NH}_4^+$  ions and (b) linear fitting results of the calibration curve.

**Figure S11.** The UV-vis standard curve of  $\text{NO}_2^-$  with different concentrations of  $\text{KNO}_2$  solutions as standards. (a) UV-vis curves of assays with  $\text{NO}_2^-$  ions and (b) linear fitting results of the calibration curve.

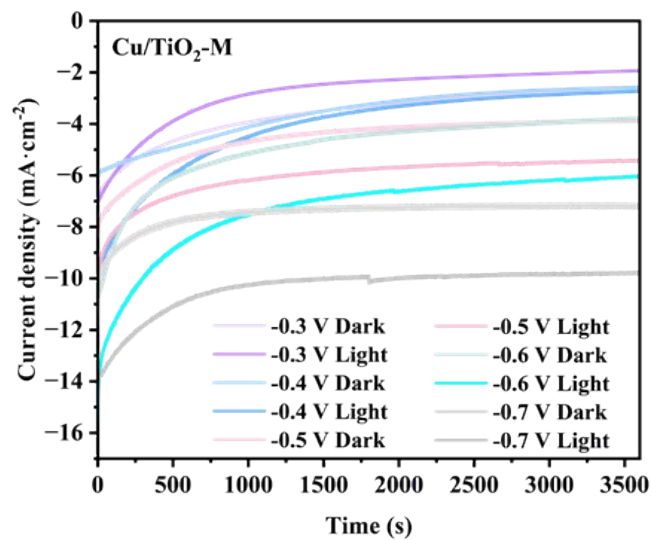

**Figure S12.** Comparison of i-t Curves under Light and Dark Conditions at Different Bias Voltages of Cu/TiO<sub>2</sub>-M photoelectrode.

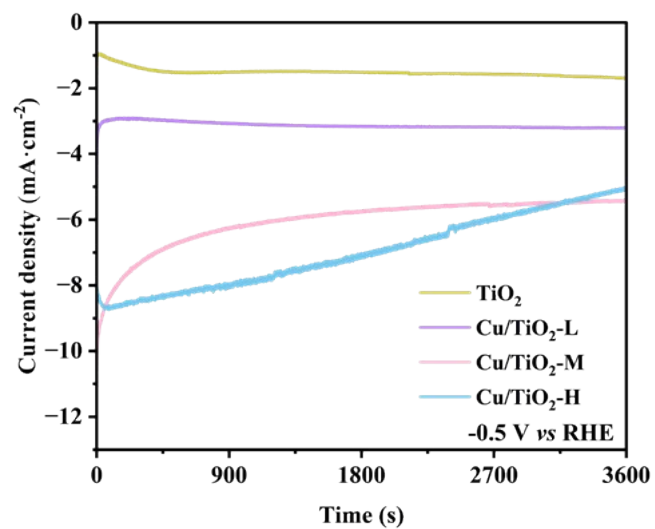

**Figure S13.** Comparison of *i-t* Curves of Cu/TiO<sub>2</sub> photoelectrodes at -0.5 V (vs RHE).

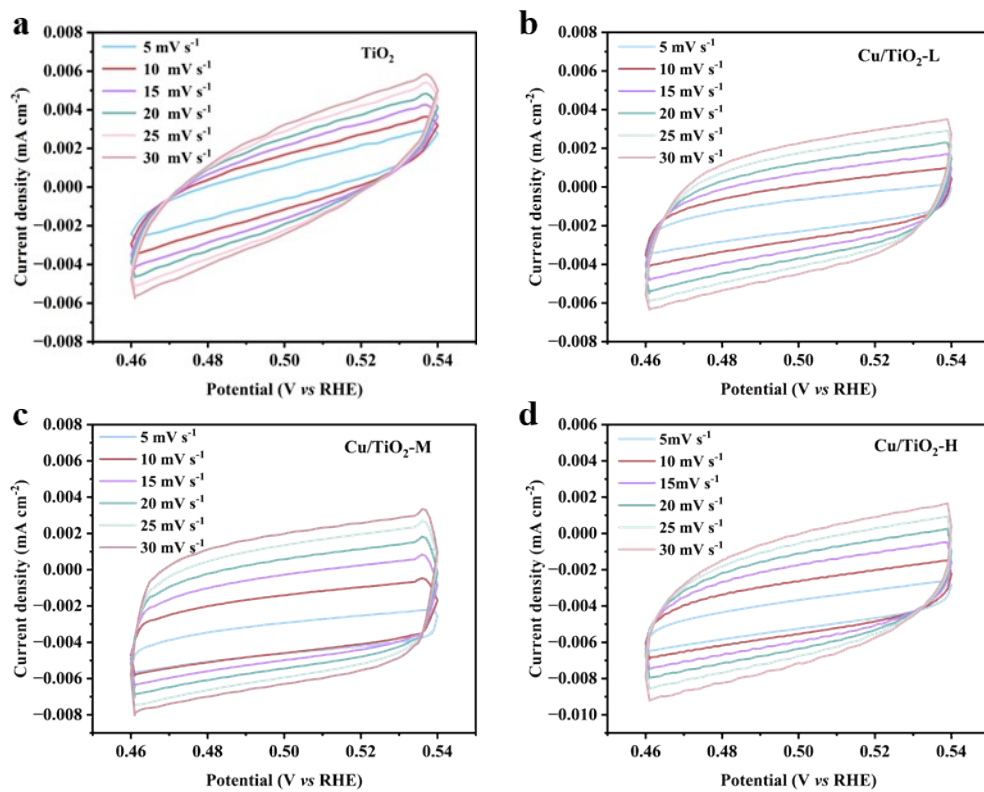

**Figure S14.** CV Curves at Different Scan Rates of Cu/TiO<sub>2</sub> photoelectrodes.

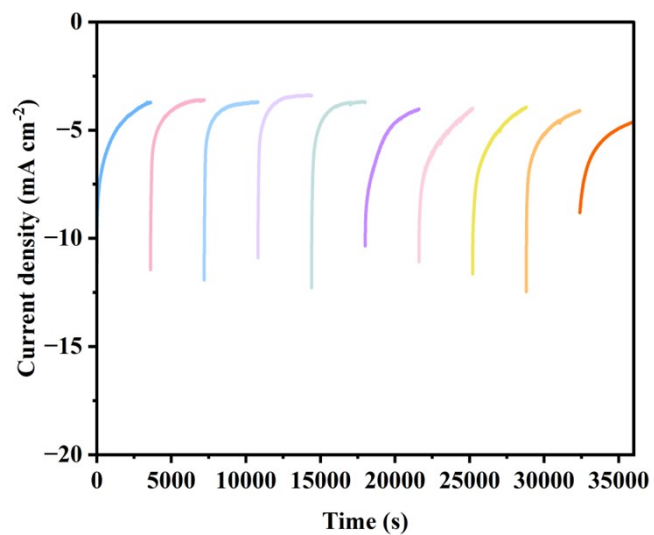

**Figure S15.** The chronoamperometry curves of Cu/TiO<sub>2</sub>-M photoelectrode during the 10 consecutive electrolysis cycles at -0.5 V (vs RHE).

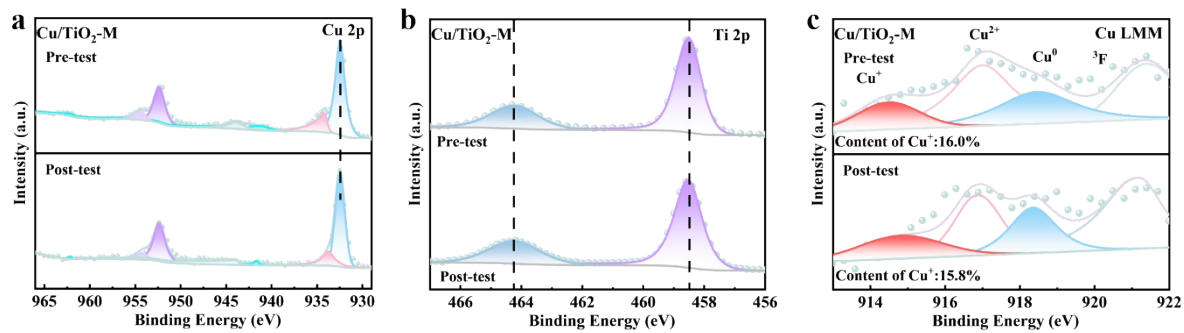

**Figure S16.** (a) high-resolution Cu 2p XPS spectra, (b) Cu LMM Auger electron spectra, (c) high-resolution Ti 2p XPS spectra before and after the catalytic process.

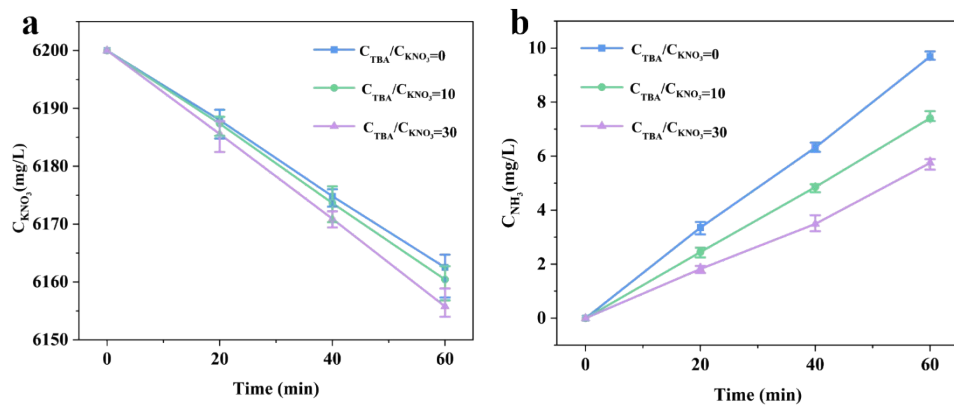

**Figure S17.** Effect of different ratios of  $C_{TBA}/C_{KNO_3}$  on (a)  $NH_3$  Formation and (b)  $KNO_3$  Consumption over Cu/TiO<sub>2</sub>-M at  $-0.5$  V vs. RHE.

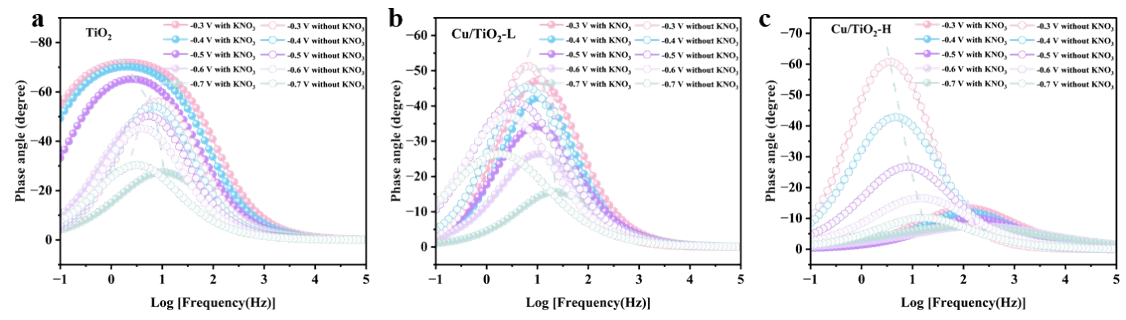

**Figure S18.** Bode phase plots of  $\text{TiO}_2$ ,  $\text{Cu/TiO}_2\text{-L}$  and  $\text{Cu/TiO}_2\text{-H}$  at varied potentials in 0.1 M KOH and 0.1 M  $\text{KNO}_3$  solution

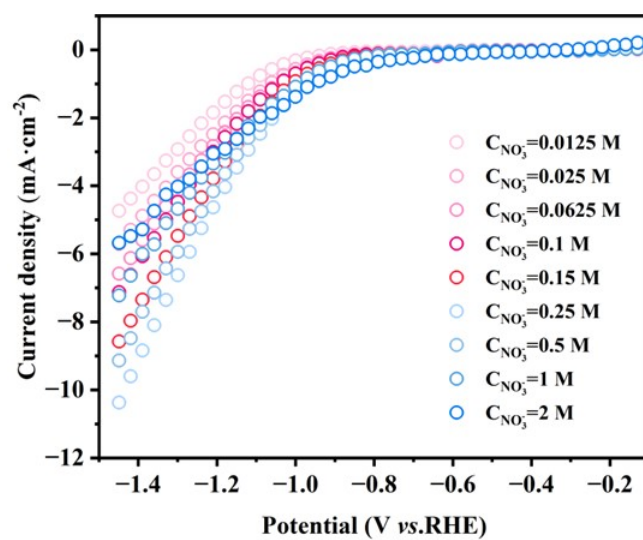

**Figure S19.** Comparison of LSV curves in KNO<sub>3</sub>/KOH electrolytes with varying ratios of Cu/TiO<sub>2</sub>-M photoelectrode.

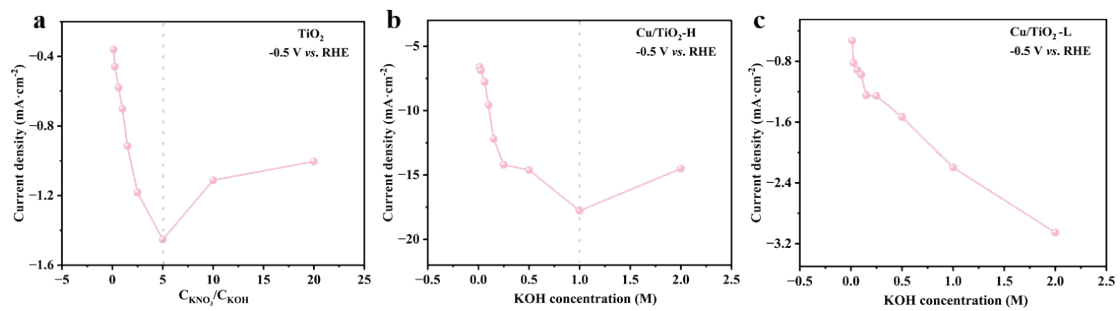

**Figure S20.** The effect of  $C_{\text{KNO}_3}/C_{\text{KOH}}$  on current density at  $-0.5$  V vs. RHE over

$\text{TiO}_2$ ,  $\text{Cu}/\text{TiO}_2\text{-L}$  and  $\text{Cu}/\text{TiO}_2\text{-H}$ .

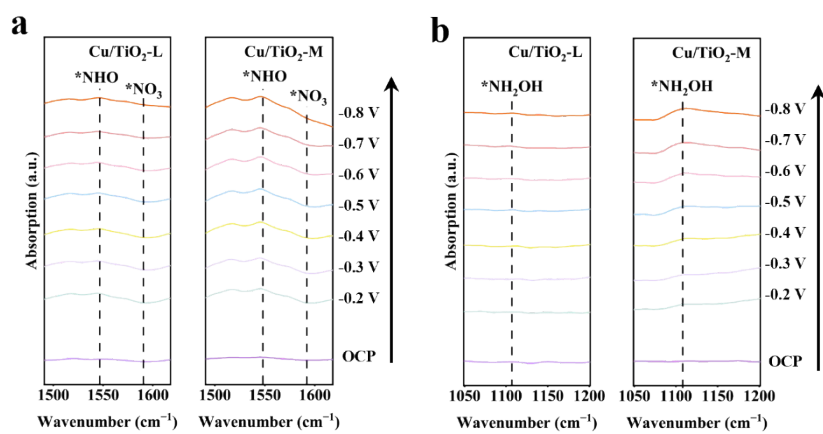

**Figure S21.** (a-b) The enlarged potential-resolved in-situ FT-IR spectra of (a) Cu/TiO<sub>2</sub>-M and (b) Cu/TiO<sub>2</sub>-L photoelectrodes.

**Table S1.** Comparison of Cu mass loading of Cu/TiO<sub>2</sub> photoelectrode.

| Sample                 | Q (C) | m (mg) |
|------------------------|-------|--------|
| Cu/TiO <sub>2</sub> -L | -0.34 | 0.11   |
| Cu/TiO <sub>2</sub> -M | -1.08 | 0.36   |
| Cu/TiO <sub>2</sub> -H | -2.15 | 0.71   |

Notes: M=63.5 g mol<sup>-1</sup>, n=2, F=96485 C mol<sup>-1</sup>

**Table S2.** Potential-dependent NH<sub>3</sub> FE and production rate of Cu/TiO<sub>2</sub>-M photoelectrode

| $E-iR_u$ | NH <sub>3</sub> Yield (mg h <sup>-1</sup> cm <sup>-2</sup> ) |                     |                     |       |                     |                     | FE (100%) |                     |                     |       |                     |                     |
|----------|--------------------------------------------------------------|---------------------|---------------------|-------|---------------------|---------------------|-----------|---------------------|---------------------|-------|---------------------|---------------------|
|          | dark                                                         | positive deviations | negative deviations | light | positive deviations | negative deviations | dark      | positive deviations | negative deviations | light | positive deviations | negative deviations |
| -0.3 V   | 0.107                                                        | 0.001               | -0.001              | 0.114 | 0.001               | -0.001              | 37.5      | 0.5                 | -0.4                | 51.9  | 0.2                 | -0.2                |
| -0.4 V   | 0.134                                                        | 0.001               | -0.001              | 0.213 | 0.002               | -0.002              | 47.1      | 0.4                 | -0.5                | 65.2  | 0.6                 | -0.8                |
| -0.5 V   | 0.230                                                        | 0.003               | -0.004              | 0.371 | 0.001               | -0.001              | 63.6      | 0.8                 | -1.1                | 85.2  | 0.3                 | -0.2                |
| -0.6 V   | 0.332                                                        | 0.001               | -0.001              | 0.477 | 0.005               | -0.004              | 69.2      | 0.3                 | -0.2                | 82.1  | 0.8                 | -0.7                |
| -0.7 V   | 0.343                                                        | 0.004               | -0.006              | 0.545 | 0.008               | -0.006              | 58.0      | 0.6                 | -1.0                | 66.4  | 1.0                 | -0.8                |

Notes: The data points represent the median values, while the error bars indicate the positive and negative deviations.

**Table S3.** Comparison of NH<sub>3</sub> production rate and FE of Cu/TiO<sub>2</sub> photoelectrode

| Sample                 | NH <sub>3</sub> Yield (mg h <sup>-1</sup> cm <sup>-2</sup> ) |                     |                     | FE (100%) |                     |                     |
|------------------------|--------------------------------------------------------------|---------------------|---------------------|-----------|---------------------|---------------------|
|                        | dark                                                         | positive deviations | negative deviations | light     | positive deviations | negative deviations |
| TiO <sub>2</sub>       | 0.065                                                        | 0.001               | -0.001              | 54.3      | 0.3                 | -0.6                |
| Cu/TiO <sub>2</sub> -L | 0.133                                                        | 0.003               | -0.002              | 53.5      | 1.0                 | -0.6                |
| Cu/TiO <sub>2</sub> -M | 0.371                                                        | 0.001               | -0.001              | 85.2      | 0.3                 | -0.2                |
| Cu/TiO <sub>2</sub> -H | 0.274                                                        | 0.003               | -0.002              | 67.3      | 0.7                 | -0.5                |

Notes: The data points represent the median values, while the error bars indicate the positive and negative deviations.

**Table S4.** Comparisons on NO<sub>3</sub>RR performances.

| Photoelectro-Catalysts                                   | Electrolyte                                                                      | FE (%) | NH <sub>3</sub> yield rate                     | Ref.      |
|----------------------------------------------------------|----------------------------------------------------------------------------------|--------|------------------------------------------------|-----------|
| <b>Cu/TiO<sub>2</sub>-M photoelectrode</b>               | 0.1 M KOH<br>0.1 M KNO <sub>3</sub>                                              | 85.2   | 0.38mg h <sup>-1</sup> cm <sup>-2</sup>        | This Work |
| <b>Other Catalysts</b>                                   |                                                                                  |        |                                                |           |
| <b>BiVO<sub>4</sub>/CuPc</b>                             | 0.5 M Na <sub>2</sub> SO <sub>4</sub><br>100 ppm NO <sub>3</sub> <sup>-</sup> -N | 20.36  | 12.98<br>μg h <sup>-1</sup> cm <sup>-2</sup>   | [1]       |
| <b>CuPc/CeO<sub>2</sub></b>                              | 0.1 M phosphate<br>Buffer KNO <sub>3</sub>                                       | 33     | 1.16<br>μmol h <sup>-1</sup> cm <sup>-2</sup>  | [2]       |
| <b>Ni-Fe LDH/graphene/Si</b>                             | 0.5 M Na <sub>2</sub> SO <sub>4</sub><br>100 mM NaNO <sub>3</sub>                | 92.5   | 12.98<br>μg h <sup>-1</sup> cm <sup>-2</sup>   | [3]       |
| <b>CoCu/TiO<sub>2</sub>/Sb<sub>2</sub>Se<sub>3</sub></b> | 10 mM H <sub>2</sub> SO <sub>4</sub><br>100 mM KNO <sub>3</sub>                  | 88.01  | 15.91<br>μmol h <sup>-1</sup> cm <sup>-2</sup> | [4]       |
| <b>ZnIn<sub>2</sub>S<sub>4</sub>/BiVO<sub>4</sub></b>    | 0.5 M Na <sub>2</sub> SO <sub>4</sub><br>150 ppm NO <sub>3</sub> <sup>-</sup>    | 37.2   | 29.95<br>μg h <sup>-1</sup> cm <sup>-2</sup>   | [5]       |
| <b>TiO<sub>x</sub>/CdS/CZTS</b>                          | 10 mM H <sub>2</sub> SO <sub>4</sub><br>100 mM KNO <sub>3</sub>                  | 89.1   | 8.21<br>μmol h <sup>-1</sup> cm <sup>-2</sup>  | [6]       |
| <b>O_SiNW/Au</b>                                         | 0.5 M K <sub>2</sub> SO <sub>4</sub><br>100 mM KNO <sub>3</sub>                  | 95.6   | 0.26<br>μmol h <sup>-1</sup> cm <sup>-2</sup>  | [7]       |
| <b>CeO<sub>2</sub>-C/BiVO<sub>4</sub></b>                | 0.5 M Na <sub>2</sub> SO <sub>4</sub><br>100 ppm NO <sub>3</sub> <sup>-</sup>    | 32.2   | 21.81<br>μg h <sup>-1</sup> cm <sup>-2</sup>   | [8]       |
| <b>NiO/Au plasmon/TiO<sub>2</sub></b>                    | 0.2 M KNO <sub>3</sub>                                                           | 44     | 3<br>μmol h <sup>-1</sup> cm <sup>-2</sup>     | [9]       |

**Table S5.** FE distribution of products over the Cu/TiO<sub>2</sub>-M photoelectrode at various applied potentials.

| $E-iR_u$ | NH <sub>3</sub> FE (%) | NO <sub>2</sub> <sup>-</sup> FE (%) | H <sub>2</sub> FE (%) |
|----------|------------------------|-------------------------------------|-----------------------|
| -0.3 V   | 51.8                   | 45.5                                | 2.3                   |
| -0.4 V   | 65.1                   | 33.0                                | 1.7                   |
| -0.5 V   | 85.1                   | 14.1                                | 0.7                   |
| -0.6 V   | 82.0                   | 16.5                                | 1.3                   |
| -0.7 V   | 66.2                   | 28.1                                | 5.4                   |

## References

- [1] Y.J. Bai, S.Y. Gao, W.R. Xie, Z.Y. Fang, H.Y. Bai, W.Q. Fan, Photoelectrochemical nitrate reduction to ammonia over BiVO<sub>4</sub>/2D macromolecular with extremely low energy consumption, *Int. J. Hydrog. Energy*. 48 (2023) 10882-10890. <http://dx.doi.org/10.1016/j.ijhydene.2022.11.329>.
- [2] X. Li, W.Q. Fan, Y.J. Bai, Y. Liu, F.F. Wang, H.Y. Bai, W.D. Shi, Photoelectrochemical reduction of nitrate to ammonia over CuPc/CeO<sub>2</sub> heterostructure: Understanding the synergistic effect between oxygen vacancies and Ce sites, *Chem. Eng. J.* 433 (2022) 8. <http://dx.doi.org/10.1016/j.cej.2021.133225>.
- [3] C.H. Chiang, Y.T. Kao, P.H. Wu, T.R. Liu, J.W. Lin, P.T. Chen, J.W. Lin, S.C. Yang, H.L. Chen, S.B. Patil, D.Y. Wang, C.W. Chen, Efficient ammonia photosynthesis from nitrate by graphene/Si Schottky junction integrated with Ni-Fe LDH catalyst, *J. Mater. Chem. A*. 11 (2023) 11179-11186. <http://dx.doi.org/10.1039/d3ta01169k>.
- [4] S.J. Ren, R.T. Gao, N.T. Nguyen, L. Wang, Enhanced Charge Carrier Dynamics on Sb<sub>2</sub>Se<sub>3</sub> Photocathodes for Efficient Photoelectrochemical Nitrate Reduction to Ammonia, *Angew. Chem.-Int. Edit.* 63 (2024) 9. <http://dx.doi.org/10.1002/anie.202317414>.
- [5] F.F. Wang, Q.J. Ding, J.R. Ding, Y.J. Bai, H.Y. Bai, W.Q. Fan, Frustrated Lewis pairs boosting photoelectrochemical nitrate reduction over ZnIn<sub>2</sub>S<sub>4</sub>/BiVO<sub>4</sub>

heterostructure, Chem. Eng. J. 450 (2022) 10.

<http://dx.doi.org/10.1016/j.cej.2022.138260>.

[6] S.J. Zhou, K.W. Sun, C.Y. Toe, J. Yin, J.L. Huang, Y.Y. Zeng, D.D. Zhang, W.J. Chen, O.F. Mohammed, X.J. Hao, R. Amal, Engineering a Kesterite-Based Photocathode for Photoelectrochemical Ammonia Synthesis from NO<sub>x</sub> Reduction, Adv. Mater. 34 (2022) 11. <http://dx.doi.org/10.1002/adma.202201670>.

[7] H.E. Kim, J. Kim, E.C. Ra, H.M. Zhang, Y.J. Jang, J.S. Lee, Photoelectrochemical Nitrate Reduction to Ammonia on Ordered Silicon Nanowire Array Photocathodes, Angew. Chem.-Int. Edit. 61 (2022) 7. <http://dx.doi.org/10.1002/anie.202204117>.

[8] H.Y. Bai, F.F. Wang, Q.J. Ding, W.R. Xie, H.P. Li, G.L. Zheng, W.Q. Fan, Construction of Frustrated Lewis Pair Sites in CeO<sub>2</sub>-C/BiVO<sub>4</sub> for Photoelectrochemical Nitrate Reduction, Inorg. Chem. 62 (2023) 2394-2403. <http://dx.doi.org/10.1021/acs.inorgchem.2c04208>.

[9] V.R. Silveira, R. Bericat-Vadell, J. Sá, Photoelectrocatalytic Conversion of Nitrates to Ammonia with Plasmon Hot Electrons, J. Phys. Chem. C. 127 (2023) 5425-5431. <http://dx.doi.org/10.1021/acs.jpcc.3c00772>.
